# Supplementary material
Source: PubMed Central journal article supplement (PMC3578998)

1 **Supplemental Information:**

2 This section contains:

3 Detailed Materials and Methods

4 References cited in Supplemental Materials

5

6 **Detailed Materials and Methods:**

7

8 *Mice*

9 *Fstl3* gene deleted (FSTL3 KO) (1) and wildtype (WT) mice (C57BL/6) were maintained at 14:10  
10 light and dark cycles. All animal studies complied with US Department of Agriculture (Protocol  
11 Number: 2005N000131/2) or UK Home Office guidelines (Project License: PPL 70/6424).

12 *Histology and Histomorphometry*

13 Testes were isolated from mice at different ages and fixed in 4% paraformaldehyde (for  
14 immunohistochemistry) or Bouin's fixative (for histology, histomorphometry and stereology)  
15 overnight. Tissues were then processed for paraffin embedding. Multiple 6µm-thick microtome  
16 sections from each tissue were stained with haematoxylin and eosin and photographed. For  
17 measurement of seminiferous tubule size distribution, Adobe Photoshop size measurement tools were  
18 used on microscope images to measure the shortest diameter of seminiferous tubules of circular cross-  
19 section. Obliquely sectioned tubules were excluded from analyses.

20 *Stereology*

21 Testes were embedded in Technovit 7100 resin, cut into 20µm sections and stained with Harris's  
22 haematoxylin. The total testis volume was estimated using the Cavalieri principle (2) and the same  
23 slides used to estimate the number of cells were also used to estimate testis volume. The optical  
24 dissector technique (3) was used to count the number of Leydig, Sertoli and germ cells in each testis.

25 Sertoli and germ cells were identified by their distinctive nuclei and position within the tubule while  
26 the Leydig cells were identified by their position within the interstitial tissue and by their round nuclei  
27 and prominent nucleoli as previously described (4). The numerical density of each cell type was  
28 estimated using an Olympus BX50 microscope fitted with a motorized stage (Prior Scientific  
29 Instruments) and Stereologer software (Systems Planning Analysis).

### 30 ***Immunofluorescence and Immunohistochemistry***

31 Immunolocalisation was performed as previously described (9). Briefly, paraffin-embedded tissue  
32 sections were de-waxed in xylenes, rehydrated and antigen was retrieved with 0.01M sodium citrate  
33 buffer. The sections were then incubated in phosphate buffered saline (PBS) containing 0.1% Triton  
34 X-100 for 20 minutes, washed and incubated in 10% horse serum in PBS for 1 hour at room  
35 temperature. Sections were incubated with primary antibodies at recommended dilutions at 4°C  
36 overnight. The primary antibodies used were rabbit polyclonal antibodies against phospho-SMAD2,  
37 pSMAD2 (Millipore), AKT and SIRT1 (Cell Signaling). For double immunofluorescence using  
38 pSMAD2 (Millipore) and SIRT1 (Cell Signaling) rabbit polyclonal antibodies, the staining was  
39 performed sequentially as described before (12) - SIRT1 antibody was probed with Alexa-Fluor-594-  
40 conjugated goat anti-rabbit IgG (Invitrogen) followed by extensive washes and then incubation with  
41 pSMAD2 antibody, probed with Alexa-Fluor-488-conjugated goat anti-rabbit IgG (Invitrogen).  
42 Sections were mounted using fluorescent mounting medium (Vector) and photographed using a Leica  
43 DM4000B fluorescence microscope. Appropriate controls to address specificity of secondary  
44 antibodies, and experiments with single antibodies were also performed to ensure double  
45 immunolocalisation is not an artifact. For immunohistochemical detection, the sections were  
46 processed with an anti-rabbit Vectastain Elite ABC kit (Vector Laboratories) and NovaRed substrate  
47 kit (Vector Laboratories).

### 48 ***Microdensitometry (to Assess Phospho-SMAD2 Expression per Cell)***

49 Serial 10µm sections of WT and FSTL3 KO mouse testes were immunohistochemically labelled for  
50 detection of phospho-SMAD2 as described above. Labeling intensity, a measure of expression per

51 cell, was measured in cells located at the periphery (early, E) and intermediate and central (late, L)  
52 zones of seminiferous tubules using a Vickers M85A scanning and integrating microdensitometer at  
53 550nm (5). At least 8 cells in each zone, in multiple tubules, in each of 5 sections from WT and  
54 FSTL3 KO mouse testes were evaluated. The amount of reaction product per cell was expressed as  
55 mean integrated extinction (x100).

### 56 *Flow Cytometry*

57 Flow cytometric analyses of testicular cells were performed as described previously (6). Briefly, testes  
58 were dissected, decapsulated and incubated in 0.25mg/ml collagenase type 3 (Sigma) at 32°C for up to  
59 30 minutes with agitation. Dispersed tubules were washed twice in PBS and then incubated with  
60 0.25mg/ml trypsin (GibcoBRL) and 1mg/ml DNaseI (Sigma) at 32°C for 10 minutes with agitation.  
61 Trypsin digestion was terminated by adding an equal volume of DMEM containing 10% fetal bovine  
62 serum (DMEM/FBS). Digested tubules were collected by centrifugation and resuspended by gentle  
63 trituration in DMEM/FBS to obtain a single-cell suspension. This was filtered through a 50µm mesh  
64 (Costar), stained with trypan blue and counted in a haemocytometer. Germ cell suspensions were  
65 stained with propidium iodide (PI) for DNA content and nuclear size analysis.  $2 \times 10^5$  cells were rinsed  
66 once with balanced salt solution, resuspended in 0.2 ml of cold PI staining solution (10mM Tris, pH  
67 8.0, 150mM NaCl, 0.1% Nonidet P40, 10 µg/ml RNaseA and 50 µg/ml PI), vortexed for 2-3 seconds  
68 and incubated on ice for 10 minutes to lyse the plasma membrane and stain nuclear DNA. Nuclear  
69 size and complexity and DNA content were determined on a BDCanto II analyser with PI detected in  
70 the phycoerythrin (PE) channel with linear amplification. The FSC and SSC profiles were gated as  
71 described before (6) to identify germ cell populations.

72

### 73 *RNA Expression Data Mining*

74 Gene expression omnibus (GEO) datasets were searched for gene expression during mouse  
75 spermatogenesis and the ‘Spermatogenesis and testis development time course (MG-U74B)’ dataset  
76 was selected as the primary data source. Data between two time points during testis development were

77 compared and significantly altered mRNA were identified using a two-tailed t-test with a significance  
78 level of  $p < 0.05$ . Genes expressed differentially during the time windows of 0-14, 20-35 and 20-56  
79 days (corresponding to somatic expansion, first wave of spermatogenesis, and spermatogenesis to  
80 post-pubertal development, respectively) in comparison to the rest of the time windows were thus  
81 identified.

## 82 ***Testis Explant Cultures***

83 WT mice were euthanized using CO<sub>2</sub> and testes were dissected using aseptic techniques. Dissected  
84 testes were de-tunicated and rapidly divided into 6 parts using sharp tweezers. These parts were  
85 briefly washed in OptiMEM containing antibiotics, gently teased to loosen tubules and cultured in  
86 OptiMEM in the presence or absence of either 25ng/ml activin (Peprotech) or 100ng/ml FSTL3 (R&D  
87 Labs) for 16 hours at 32°C. At the end of treatment, cultured testis explants were washed once in ice-  
88 cold PBS and directly lysed in lysis buffer (50mM Tris-HCl, pH 7.4, 1% NP-40, 150mM NaCl,  
89 20mM NaF, 10mM Na<sub>2</sub>P<sub>2</sub>O<sub>7</sub>, 1mM Na<sub>3</sub>VO<sub>4</sub>) supplemented with a mixture of protease inhibitors  
90 (Complete Mini, Roche Applied Science).

## 91 ***Preparation of Tissue Lysates and Western Blotting***

92 Frozen tissue samples were pulverized in dry ice and homogenized in lysis buffer (50mM Tris-HCl,  
93 pH 7.4, 1% NP-40, 150mM NaCl, 20mM NaF, 10mM Na<sub>2</sub>P<sub>2</sub>O<sub>7</sub>, 1mM Na<sub>3</sub>VO<sub>4</sub>) supplemented with a  
94 mixture of protease inhibitors (Complete Mini, Roche Applied Science). This homogenate was then  
95 sonicated at low power to shear chromosomal DNA and centrifuged to remove debris. Protein  
96 concentrations were estimated using a Bradford colorimetric assay (Bio-Rad). 50µg of total protein  
97 lysate were loaded on 10% SDS PAGE gels and size separated using constant current. After  
98 electrophoresis, proteins were transferred from gels to pure nitrocellulose membranes (Amersham  
99 Biosciences) and efficiency of transfer assessed by Ponceau-S staining. The membranes were then  
100 washed in TBST (50 mM Tris pH7.5, 150 mM NaCl, 0.05% Tween 20) and incubated with blocking  
101 buffer (5% non-fat dry milk in TBST) at room temperature for 1 hour. Protein blots were incubated  
102 with primary antibodies, used at recommended dilutions in blocking buffer, overnight at 4°C.

103 Membranes were washed three times with TBST and then incubated with appropriate horseradish  
104 peroxidase conjugated secondary antibodies (Sigma). The membranes were again washed four times  
105 and immune complexes formed on the blot were visualized by ECL (Amersham Biosciences).  
106 Immunoreactive protein bands were analyzed using the public domain NIH Image program  
107 (developed at the United States National Institutes of Health and available on the Internet at  
108 <http://rsb.info.nih.gov/nih-image/>). Of the AKT antibodies used in this study, pan-AKT antibody  
109 reacts to all three forms of AKT and phosphoAKT antibody identifies AKT phosphorylated at Ser473.

## 110 *Quantitative Proteomics*

111 Preparation of Lysates: Freshly dissected testes were lysed in a dounce-homogeniser in lysis buffer  
112 (50mM Tris pH 8.1, 75mM NaCl, 8M urea, 10mM sodium pyrophosphate, 1mM sodium fluoride,  
113 1mM  $\beta$ -glycerophosphate, 1mM sodium orthovanadate) supplemented with a mixture of protease  
114 inhibitors (Complete Mini, Roche Applied Science). This homogenate was then sonicated at low  
115 power to shear chromosomal DNA and centrifuged to remove debris. The supernatant was collected  
116 into a new tube and protein concentration was measured using a Bradford colorimetric assay (Bio-  
117 Rad).

118 Sample Preparation: Reduction and alkylation of cysteines were performed on 15 mg of testis protein  
119 by incubation in 2.5mM DTT for 25 minutes at 60°C and then 30 minutes at room temperature in  
120 7mM iodoacetamide in the dark, respectively. The alkylation reaction was quenched by the addition  
121 of DTT to 2.5mM and an additional 15 minutes incubation. Lysate was 8-fold diluted (25mM Tris, pH  
122 8.1, 1mM CaCl<sub>2</sub>), and 40  $\mu$ g of sequencing grade trypsin (Promega) was added (5ng/ml trypsin;  
123 enzyme/substrate ratio of 1:250). Digestion was stopped after 16 h at 37°C by the addition of  
124 trifluoroacetic acid (TFA) to 0.4%, and the pH was verified at = 2. The digest was centrifuged at  
125 3,200 rpm to remove insoluble material and then loaded onto a 500-mg tC18 SepPak cartridge  
126 (Waters) for peptide desalting. Eluted peptides were labeled with either normal (no isotope label) or  
127 heavy (d<sub>6</sub>), dimethyl groups for WT and FSTL3 KO respectively (7). Peptides from KO and WT  
128 testes were mixed, lyophilized and stored at -20°C until further use.

129 Liquid Chromatography Tandem Mass Spectrometry (LC-MS/MS) Analyses: Dried peptides were  
130 resuspended in 5% acetonitrile (ACN) and 4% formic acid (FA) and 2  $\mu$ l was loaded onto a  
131 microcapillary column packed with C18 beads (Magic C18AQ, 5 $\mu$ m, 200 Å, 125  $\mu$ m x 16 cm) using a  
132 Famos autosampler (LC Packings). Peptides were separated by reversed-phase chromatography using  
133 an Agilent 1100 binary pump with a 70-minute gradient of 5-30% ACN (in 0.125% FA). Peptides  
134 were detected in a hybrid dual-cell quadrupole linear ion trap - orbitrap mass spectrometer (LTQ  
135 Orbitrap Velos, ThermoFisher) using a data-dependent Top20 method (8). For each cycle, one full  
136 MS scan in the Orbitrap at  $10^6$  AGC target was followed by up to 20 MS/MS in the LTQ for the most  
137 intense ions. Selected ions were excluded from further analysis for 30 seconds. Ions with charge 1+ or  
138 unassigned were also rejected. Maximum ion accumulation times were 1000ms for each full MS scan  
139 and 150ms for MS/MS scans.

140 Database Searches and Peptide Quantification: Following acquisition of mass spectrometry data,  
141 RAW files were converted into mzXML format and processed with comprehensive proteomics data  
142 analysis software developed in-house. Individual precursors selected for MS/MS fragmentation were  
143 checked using algorithms that find and adjust incorrect monoisotopic peak assignments while refining  
144 precursor ion mass measurements. MS/MS spectra were searched against a composite database  
145 containing the mouse International Protein Index (IPI) database (9) and reversed 'decoy' versions of  
146 these proteins using the SEQUEST algorithm (10, 11). Peptide quantification was performed using the  
147 VISTA algorithm (12).

148

149

150 **References cited in Supporting Information**

- 151 1. **Mukherjee A, Sidis Y, Mahan A, Raheer M, Xia Y, Rosen E, Bloch KD, Thomas MK,**  
152 **Schneyer AL** 2007 FSTL3 deletion reveals roles for TGF $\beta$  family ligands in glucose and fat  
153 homeostasis in adults. *Proc Natl Acad Sci USA* 104: 1348-1353.
- 154 2. **Mayhew TM, Olsen DR** 1991 Magnetic resonance imaging (MRI) and model-free estimates  
155 of brain volume determined using the Cavalieri principle. *J Anat* 178: 133-144.
- 156 3. **Wreford NG** 1995 Theory and practice of stereological techniques applied to the estimation  
157 of cell number and nuclear volume in the testis. *Microsc Res Tech* 32: 423-436.
- 158 4. **Baker PJ, O'Shaughnessy PJ** 2001 Role of gonadotrophins in regulating numbers of Leydig  
159 and Sertoli cells during fetal and postnatal development in mice. *Reproduction* 122: 227-234.
- 160 5. **Bastow ER, Lamb KJ, Lewthwaite JC, Osborne AC, Kavanagh E, Wheeler-Jones CP,**  
161 **Pitsillides AA** 2005 Selective activation of the MEK-ERK pathway is regulated by  
162 mechanical stimuli in forming joints and promotes pericellular matrix formation. *J Biol Chem*  
163 280: 11749-11758.
- 164 6. **Coultas L, Bouillet P, Loveland KL, Meachem S, Perlman H, Adams JM, Strasser A**  
165 2005 Concomitant loss of proapoptotic BH3-only Bcl-2 antagonists Bik and Bim arrests  
166 spermatogenesis. *EMBO J* 24: 3963-3973.
- 167 7. **Tolonen AC, Haas W, Chilaka AC, Aach J, Gygi SP, Church GM** 2011 Proteome-wide  
168 systems analysis of a cellulosic biofuel-producing microbe. *Mol Syst Biol* 7:461.
- 169 8. **Haas W, Faherty BK, Gerber SA, Elias JE, Beausoleil SA, Bakalarski CE, Li X, Villén**  
170 **J, Gygi SP** 2006 Optimization and use of peptide mass measurement accuracy in shotgun  
171 proteomics. *Mol Cell Proteomics* 5: 1326-1337.
- 172 9. **Kersey PJ, Duarte J, Williams A, Karavidopoulou Y, Birney E, Apweiler R** 2004 The  
173 International Protein Index: an integrated database for proteomics experiments. *Proteomics* 4:  
174 1985-1988.

- 175 10. **Eng JK, McCormack AL, Yates JR** 1994 An approach to correlate tandem mass spectral  
176 data of peptides with amino-acid-sequences in a protein database. *J Am Soc Mass Spectrom*  
177 5: 976-989.
- 178 11. **Elias JE, Gibbons FD, King OD, Roth FP, Gygi SP** 2004 Intensity-based protein  
179 identification by machine learning from a library of tandem mass spectra. *Nat Biotechnol* 22:  
180 214-219.
- 181 12. **Bakalarski CE, Elias JE, Villén J, Haas W, Gerber SA, Everley PA, Gygi SP** 2008 The  
182 impact of peptide abundance and dynamic range on stable-isotope-based quantitative  
183 proteomic analyses. *J Proteome Res* 7: 4756-4765.
- 184



1 **Supplemental Material**

2 **Supplemental Figure Legends**

3 **Supplemental Fig. 1: Genes differentially expressed during postnatal testis**  
4 **development.** Genes in WT testes showing significantly increased expression in each of  
5 three age windows during postnatal testicular development, compared to the other two age  
6 groups tested. Cellular changes within the testis corresponding to these ages are presented as  
7 a schematic diagram on the left of the table. *Igfbp3* and *Igfbp5*, shown in bold, are amongst  
8 genes induced during the somatic cell expansion stage (0-14d) and are discussed in the main  
9 text.

10

11 **Supplemental Fig. 2: AKT-mediated GSK3 $\beta$  phosphorylation and  $\beta$ -catenin expression**  
12 **is increased in FSTL3 KO testes.** Western blot analyses of lysates from WT and FSTL3 KO  
13 testes showing (A) phospho-GSK3 $\beta$  and GSK3 $\beta$  (Mr: 46 kDa) and (C)  $\beta$ -catenin (Mr: 92  
14 kDa) and tubulin (Mr: 65 kDa), as indicated. Densitometric analyses of Western blots  
15 showing the ratio of (B) phosphorylated to total GSK3 $\beta$  and (D)  $\beta$ -catenin to tubulin in WT  
16 and KO testes presented as bar graphs. (n = 3, error bars = SEM, \*\* = p<0.001).

17

18 **Supplemental Fig. 3: Reduced apoptosis in FSTL3 KO testes.** Representative TUNEL  
19 staining of apoptotic nuclei in WT and FSTL3 KO testes at 16 months. TUNEL positive  
20 nuclei are indicated by arrows. (Images are at 10x magnification)

21

22 **Supplemental Fig. 4: SMAD2 activation is altered in FSTL3 KO testes. A:**  
23 Immunostaining for phospho-SMAD2 (pSMAD2) in testicular sections from 4 month old  
24 WT and FSTL3 KO (KO) mice shown at 20x magnification. **B:** Microdensitometric

25 measurement of immunostaining obtained using phospho-SMAD2 antibody in the early (E)  
26 and late (L) cells of seminiferous tubules in testicular sections from WT and FSTL3 KO  
27 (KO) mice. **C:** Number of seminiferous tubules, shown as bar-graphs of the percentage of  
28 total tubules counted, that show no immunostaining (N), staining only in the early (E) or  
29 including late (L) spermatogenic cells using phospho-SMAD2 (pSMAD2) or phospho-  
30 SMAD5 (pSMAD5) antibodies in WT and FSTL3 KO testes. **D:** Examples of tubules  
31 classified as N, E and L. (Error bars = SEM, \* =  $p < 0.05$ ).

32

33 **Supplemental Fig. 5: Model depicting putative role of FSTL3 in testicular aging.** Activin  
34 action promotes the maintenance of testicular function. FSTL3 inhibits activin action by  
35 directly binding to activin. In the absence of FSTL3, therefore, activin action is increased. In  
36 FSTL3 KO mice, AKT dependent signaling is also induced, either via increased activin  
37 action or indirectly, as a result of the removal of another inhibitory function of FSTL3. In the  
38 FSTL3 KO mice, therefore, AKT action-dependent cell survival mechanisms are induced:  
39 AKT-mediated phosphorylation and thus inhibition of GSK3 $\beta$  increases  $\beta$ -catenin, a  
40 promoter of cell growth, and AKT-mediated zyxin phosphorylation inhibits acinus, a  
41 promoter of cell apoptosis. An interaction partner for zyxin action is SIRT1. Both zyxin and  
42 SIRT1 are induced in FSTL3 KO testis possibly in an activin-induced SMAD-dependent  
43 manner. SIRT1 action might therefore contribute to anti-aging effects thus prolonging  
44 testicular function in the FSTL3 KO mouse. Green arrows denote stimulation, red lines  
45 denote inhibition and dotted lines signify postulated regulation.

46

47 **Supplemental Table 1: Summary of candidate proteins important in maintenance of**  
48 **testicular size or age-related regression.** List of proteins reduced or induced by at least 1.5  
49 fold over WT with mean fold expression  $> 3SD$ .

50

51

Supplemental Table 1

|         | Fold change | Protein ID   | MGI Gene Name        |
|---------|-------------|--------------|----------------------|
| Reduced | 58.43       | IPI00604969  | <i>Ttn</i>           |
|         | 2.00        | IPI00118438  | <i>Srrm1</i>         |
|         | 1.89        | IPI00230124  | <i>Fabp3</i>         |
|         | 1.61        | IPI00309964  | <i>Nnt</i>           |
|         | 1.53        | IPI00132799  | <i>C1qbp</i>         |
|         | 1.50        | IPI00125515  | <i>Stard10</i>       |
| Induced | 3.14        | IPI00170084  | <i>2900057D21Rik</i> |
|         | 2.19        | IPI00125319  | <i>Gsk3b</i>         |
|         | 2.11        | IPI00113726  | <i>Lama1</i>         |
|         | 1.97        | IPI00137908  | <i>Col4a4</i>        |
|         | 1.90        | IPI00121430  | <i>Col12a1</i>       |
|         | 1.83        | IPI00322304  | <i>Hrg</i>           |
|         | 1.81        | IPI00128076  | <i>Serpina3c</i>     |
|         | 1.69        | IPI00381431  | <i>Xmr</i>           |
|         | 1.68        | IPI00315452  | <i>Pnp</i>           |
|         | 1.66        | IPI00109588  | <i>Col4a1</i>        |
|         | 1.58        | IPI00387422  | <i>Zyx</i>           |
|         | 1.54        | IPI00114944  | <i>BC003940</i>      |
|         | 1.54        | IPI00323822  | <i>Rras2</i>         |
|         | 1.52        | IPI00341314  | <i>Mdn1</i>          |
| 1.52    | IPI00230035 | <i>Ddx3x</i> |                      |

# Supplemental Fig. 1

|                                                                                                                                                                                                                                            | Age Group (days) | Genes Upregulated                                                                                                                                                                                                                         |
|--------------------------------------------------------------------------------------------------------------------------------------------------------------------------------------------------------------------------------------------|------------------|-------------------------------------------------------------------------------------------------------------------------------------------------------------------------------------------------------------------------------------------|
| <p><b>d0</b></p> <p>Gonocyte → 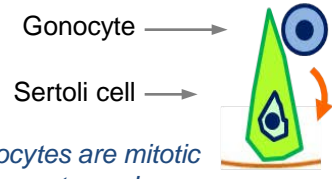</p> <p>Sertoli cell →</p> <p><i>Sertoli cell and gonocytes are mitotic<br/>Gonocytes migrate to basement membrane</i></p> | <p>0 - 14</p>    | <p><i>Agtr2, Akap11, Art3, Bnc1, Bsg, Crabbp1, Cul3, Ddx4, Dmc1, Dmrt1, Hmgn2, Hsdl2, <b>Igfbp3</b>, <b>Igfbp5</b>, Lox, Mest, Mns1, Nefh, Nono, Nptx2, Pick1, Pno1, Smo, Sox18, Srpk1, Srpk2, Tbl2, Tgfbr3, Trim37, Ube1y1, Vnn1</i></p> |
| <p><b>d14</b></p> <p>Spermatocyte → </p> <p>Spermatogonia →</p> <p><i>Sertoli cells are terminally differentiated<br/>Spermatogonia are mitotic</i></p>   |                  | <p>20 - 35</p>                                                                                                                                                                                                                            |
| <p><b>d20</b></p> <p>Round Spermatid → </p> <p><i>First wave of spermatogenesis</i></p>                                                                   | <p>20 - 56</p>   |                                                                                                                                                                                                                                           |
| <p><b>d35</b></p> <p>Elongating Spermatid → </p> <p><i>Pre-pubertal testis</i></p>                                                                      |                  |                                                                                                                                                                                                                                           |
| <p><b>d56</b></p> <p>Spermatozoa → </p> <p><i>Adult testis</i></p>                                                                                      |                  |                                                                                                                                                                                                                                           |

# Supplemental Fig. 2

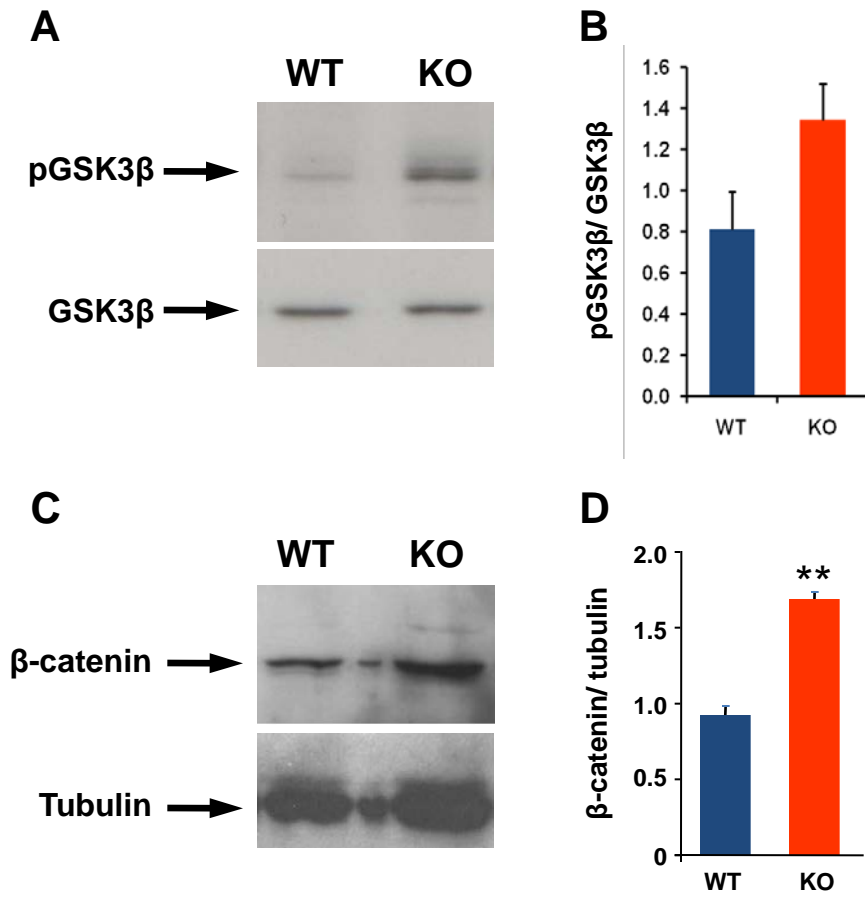

# Supplemental Fig. 3

WT

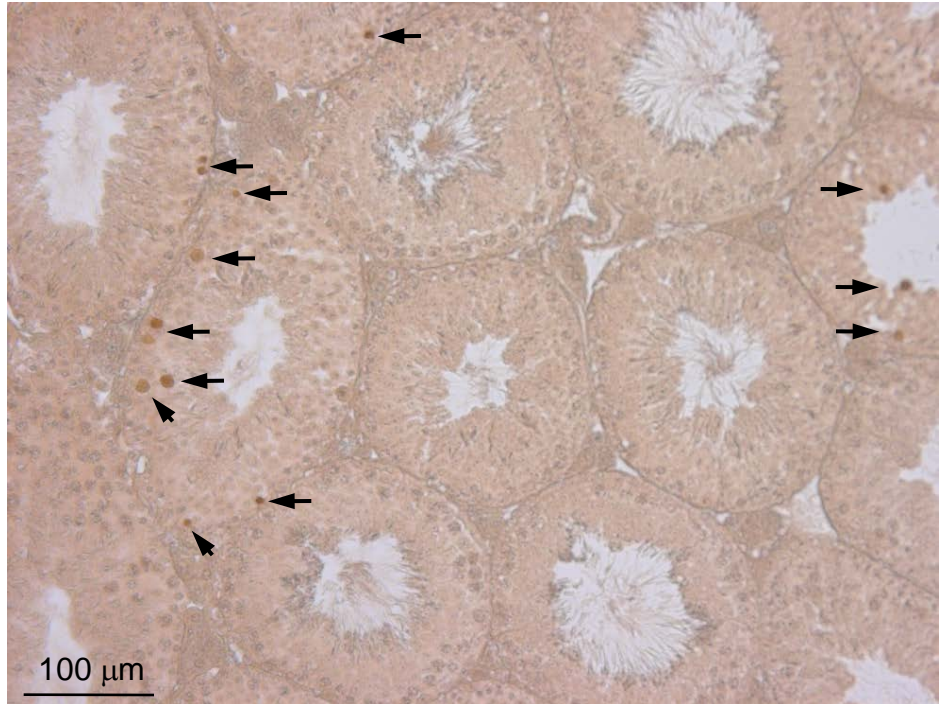

FSTL3 KO

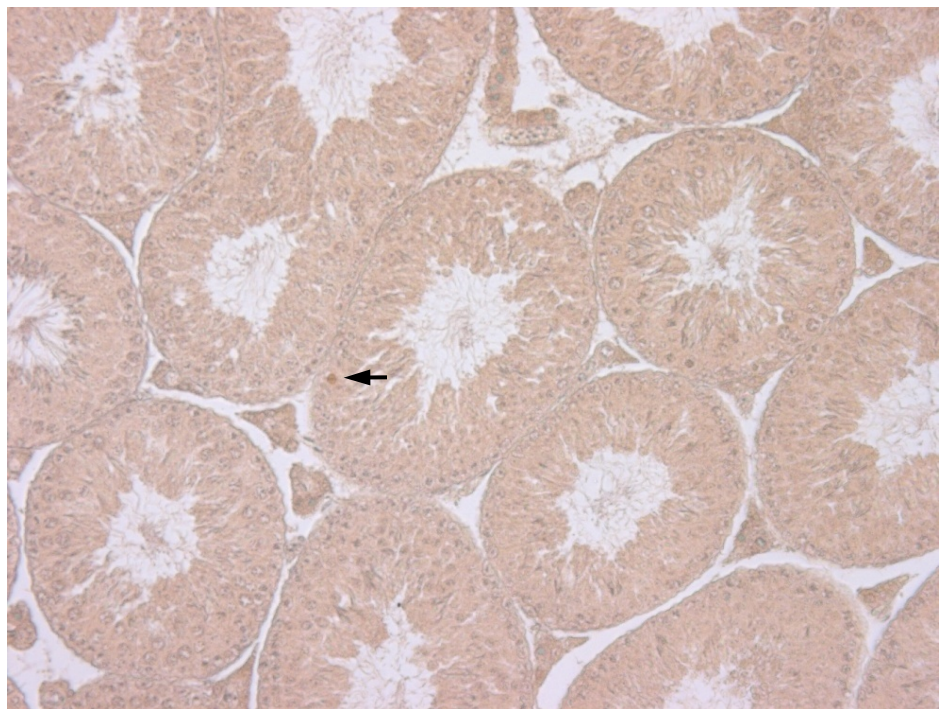

# Supplemental Fig. 4

**A**

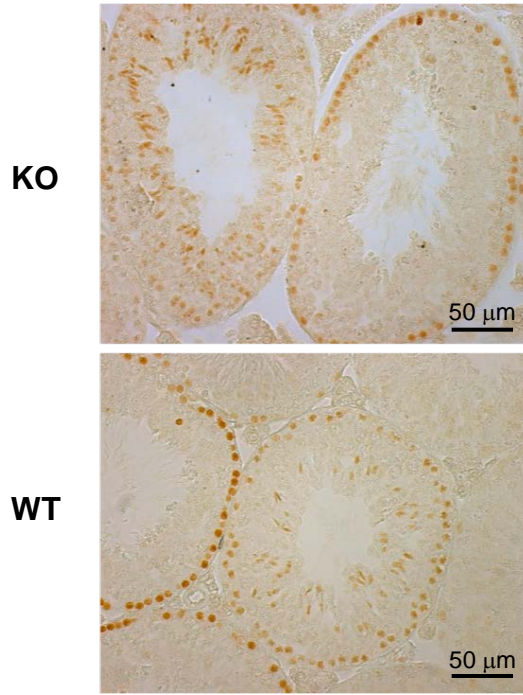

pSMAD2

**B**

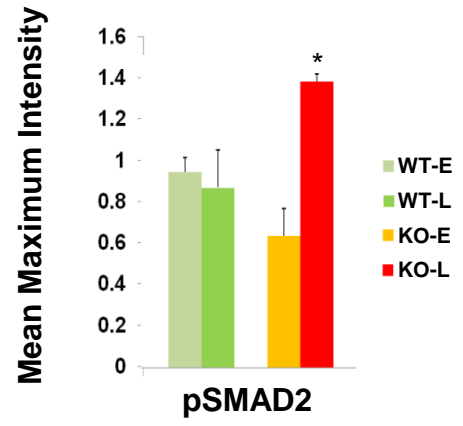

**C**

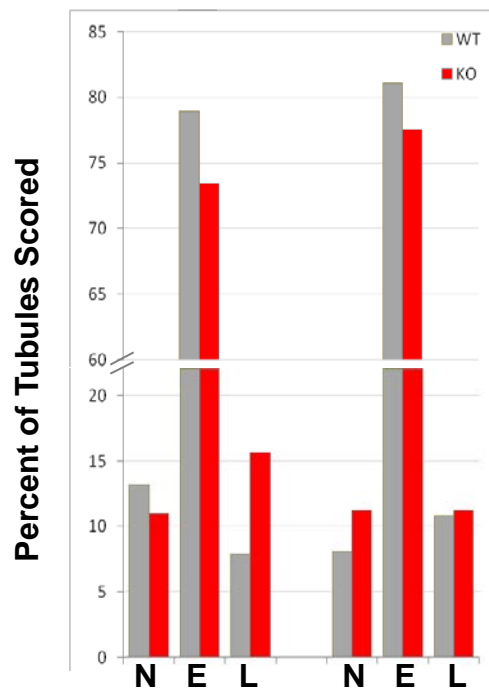

**D**

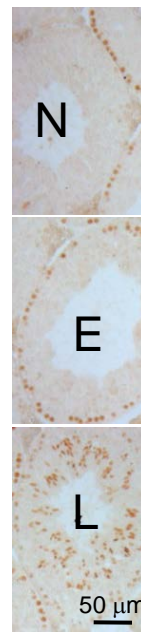



Supplemental Fig. 5

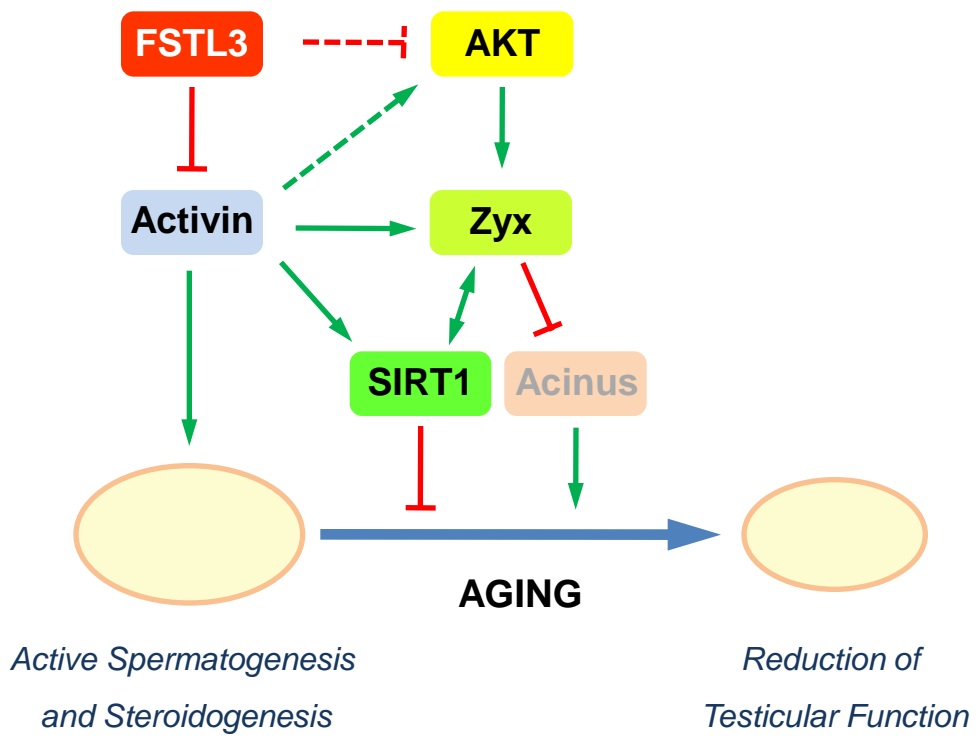

Supplement: supp_en.2012-1886_EN-12-1886mmfigs5tab1.pdf [file supp_en.2012-1886_EN-12-1886mmfigs5tab1.pdf]
